# Supplementary material for: Brain morphometry in Pontocerebellar Hypoplasia type 2
Source: PubMed Central journal article supplement (PMC4950429; doi:10.1186/s13023-016-0481-4), 2016-07-19
Supplement: 13023_2016_481_MOESM1_ESM.pdf [file 13023_2016_481_MOESM1_ESM.pdf]

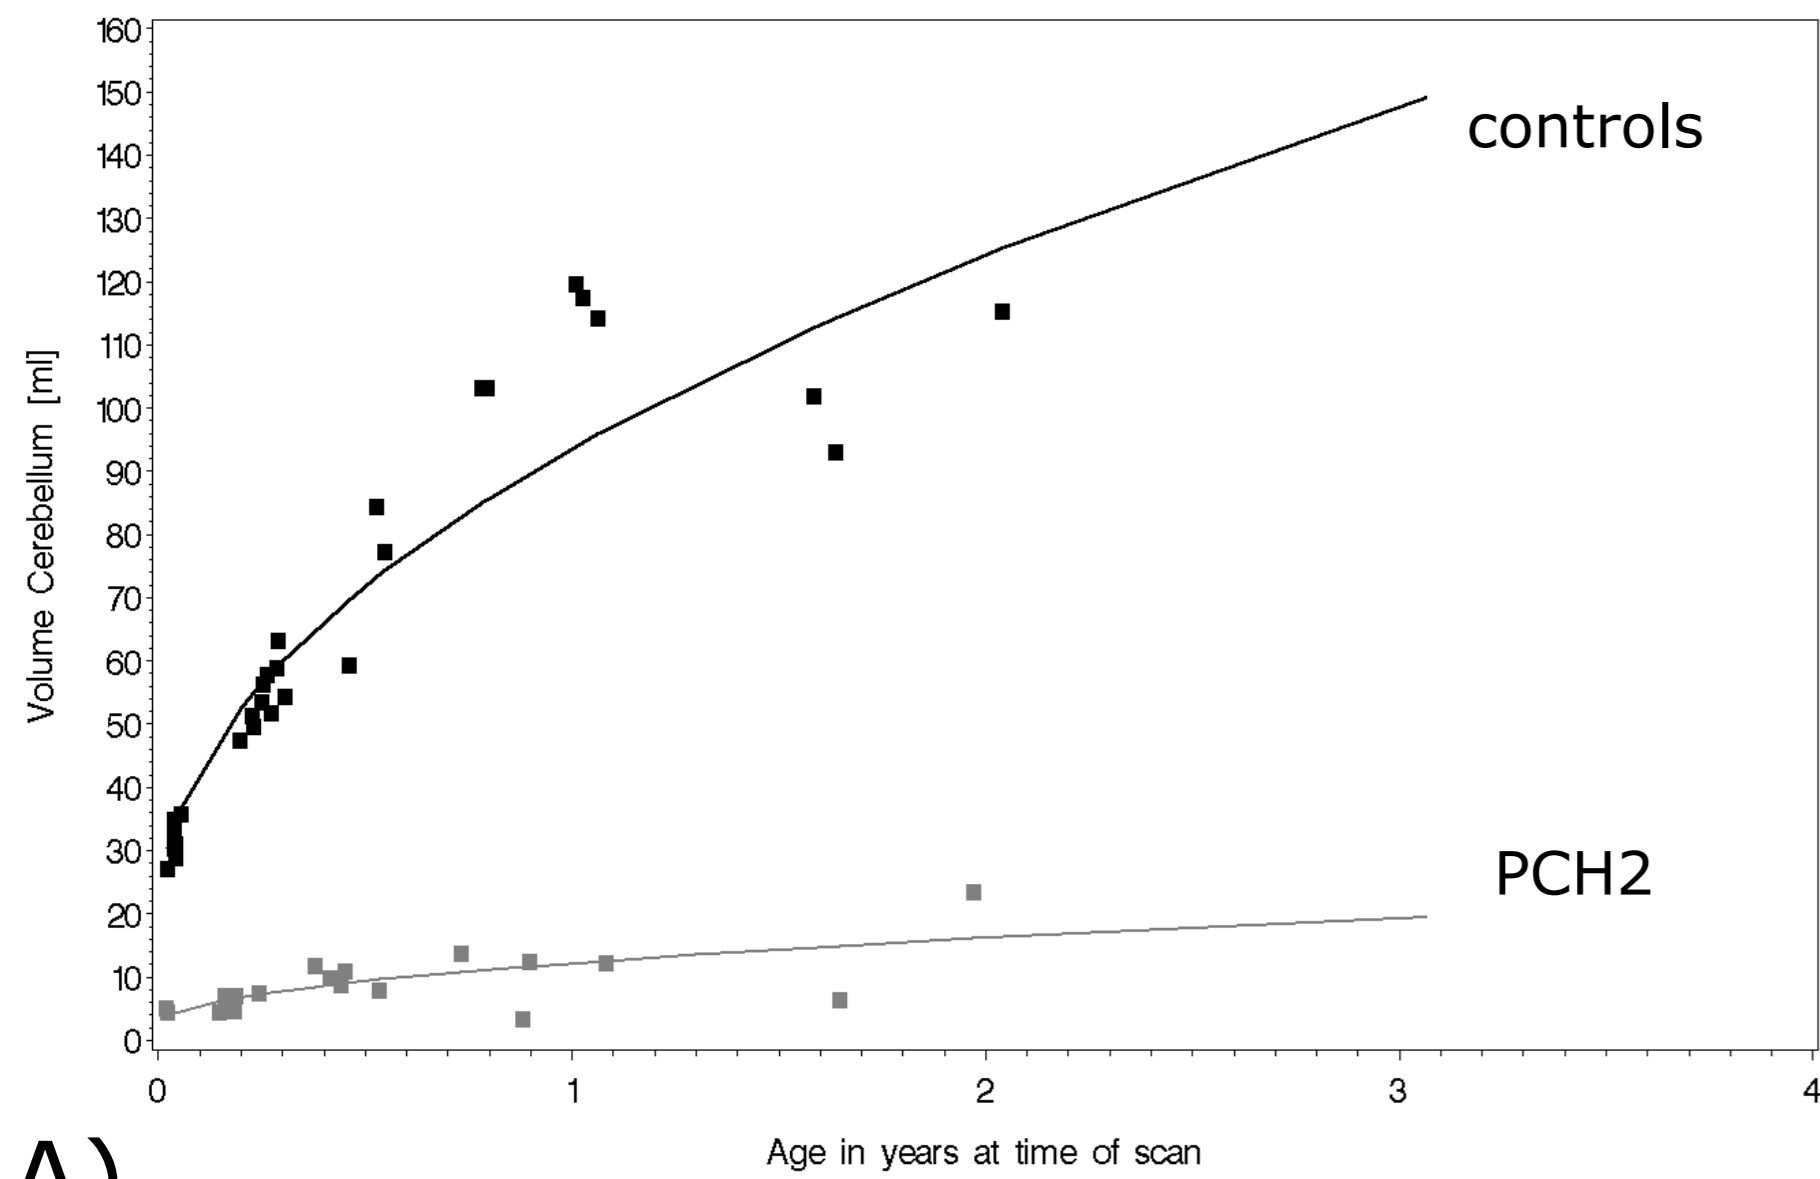

A)

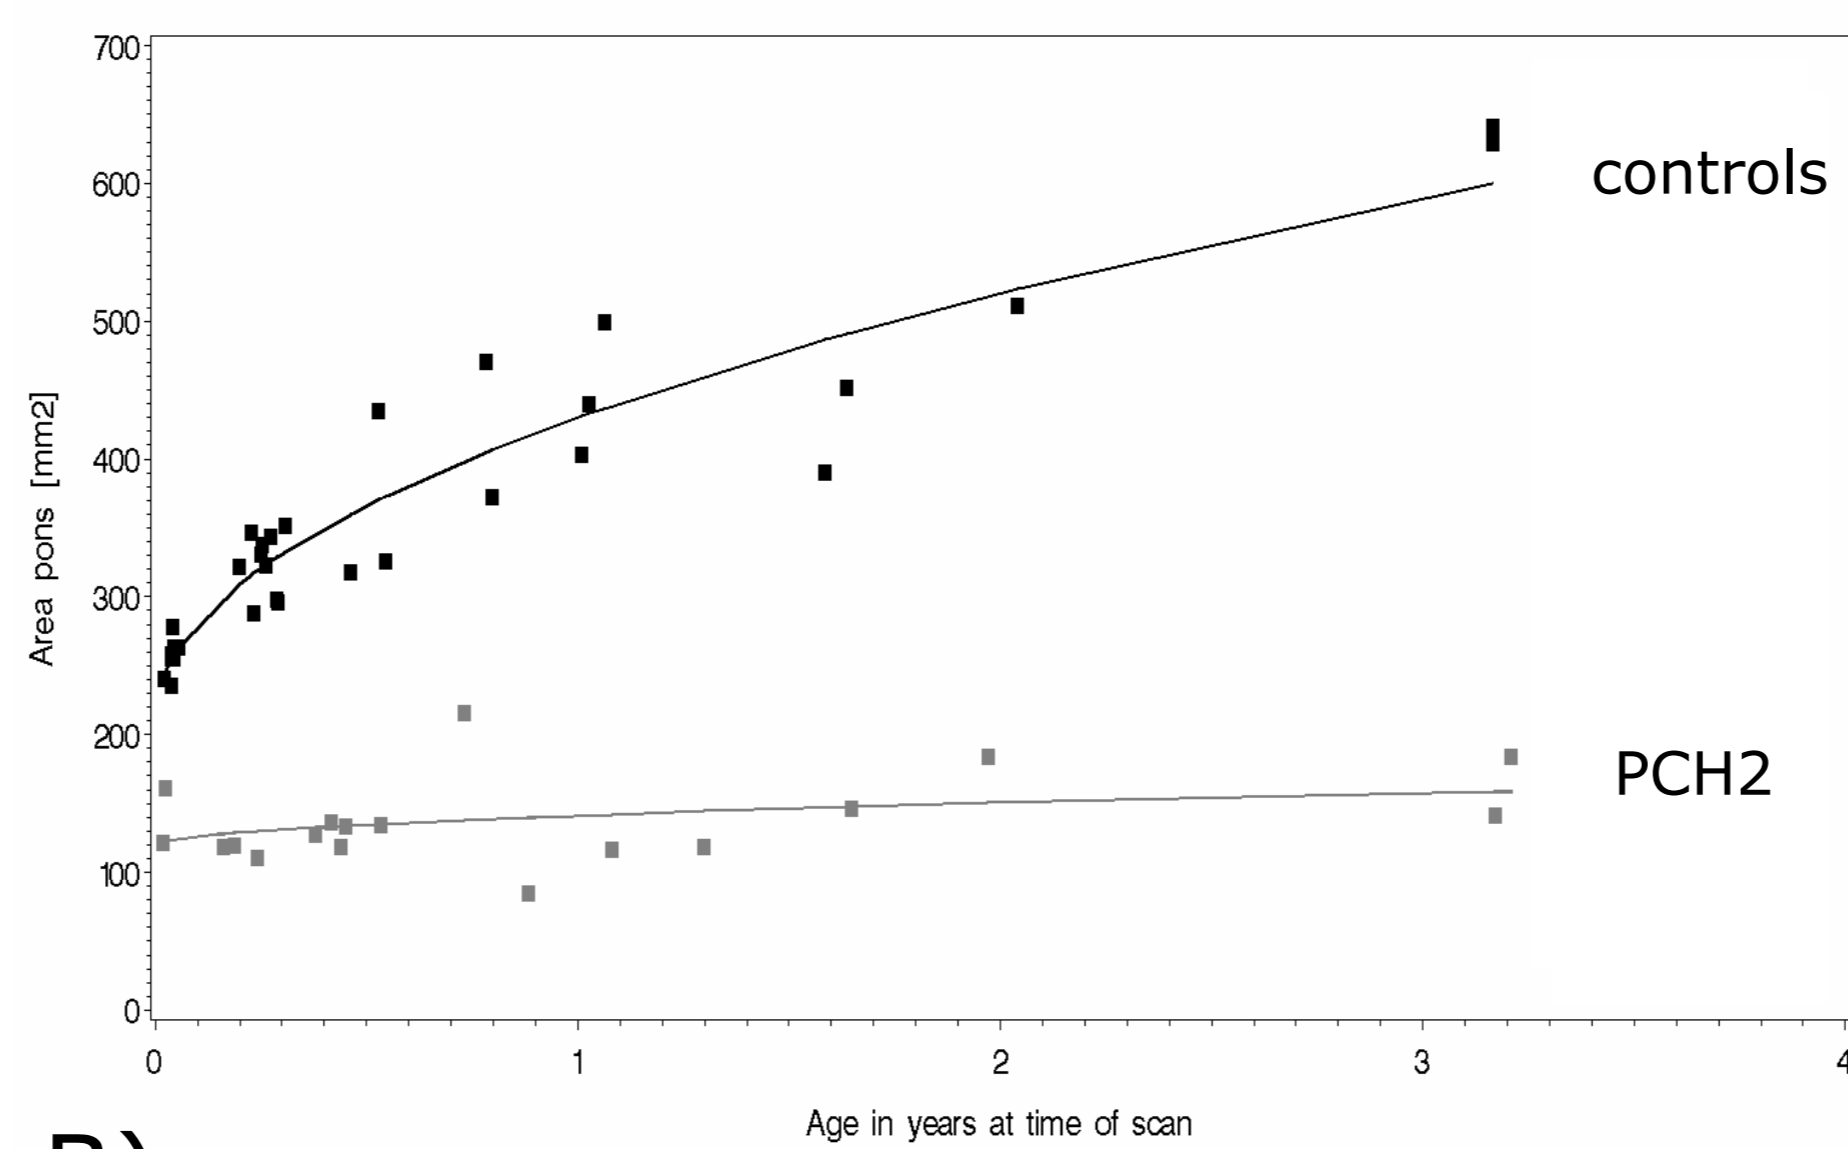

B)

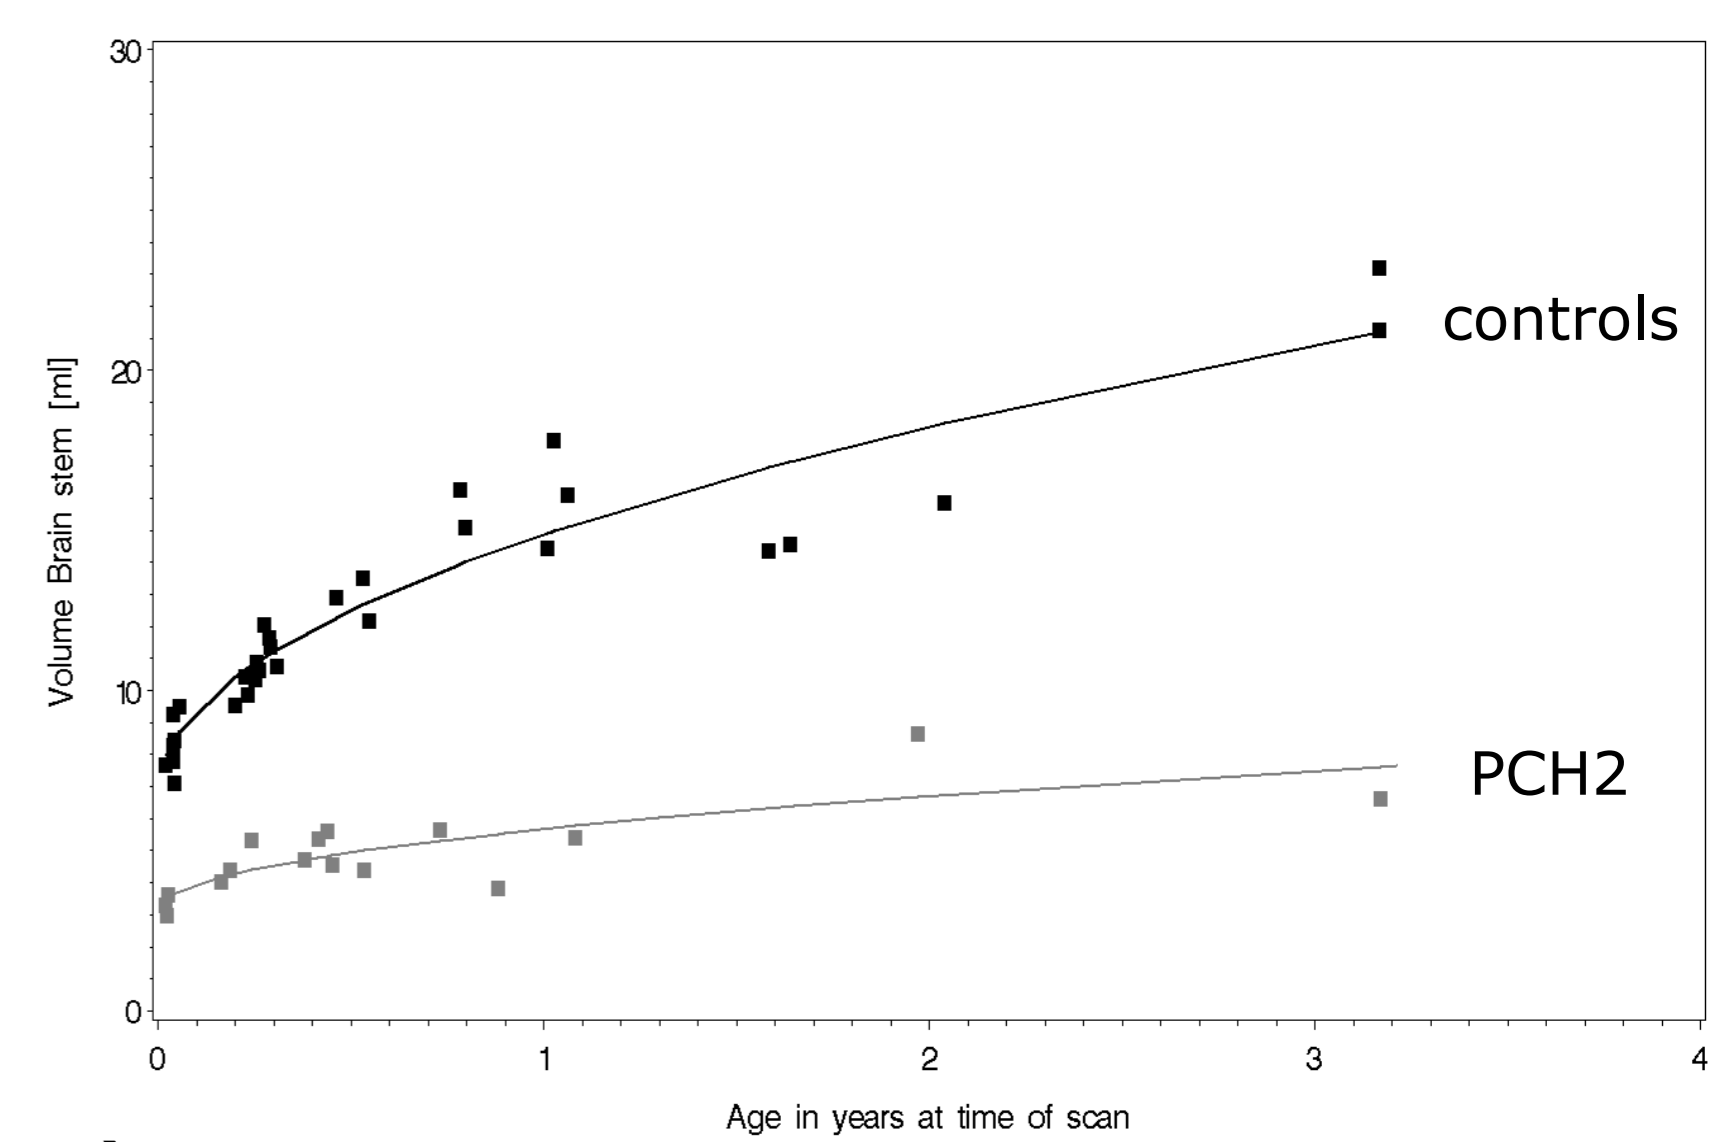

C)

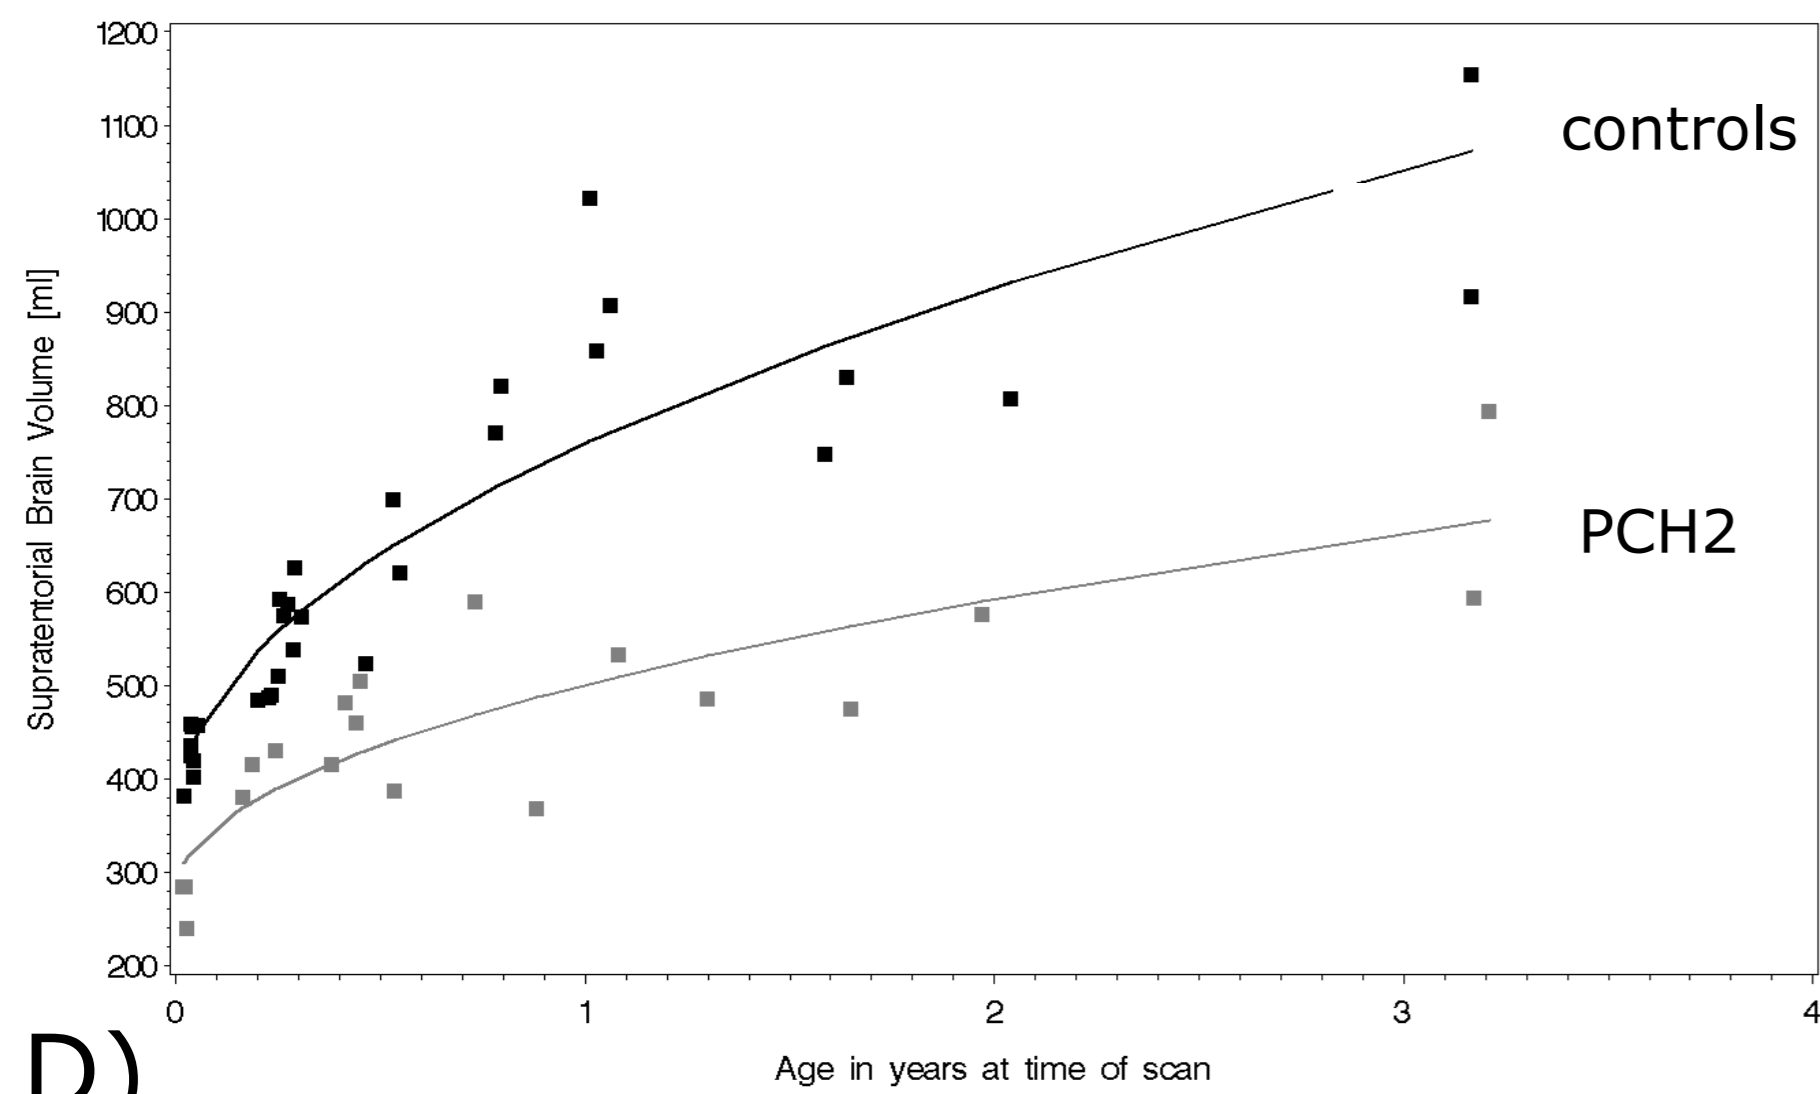

D)

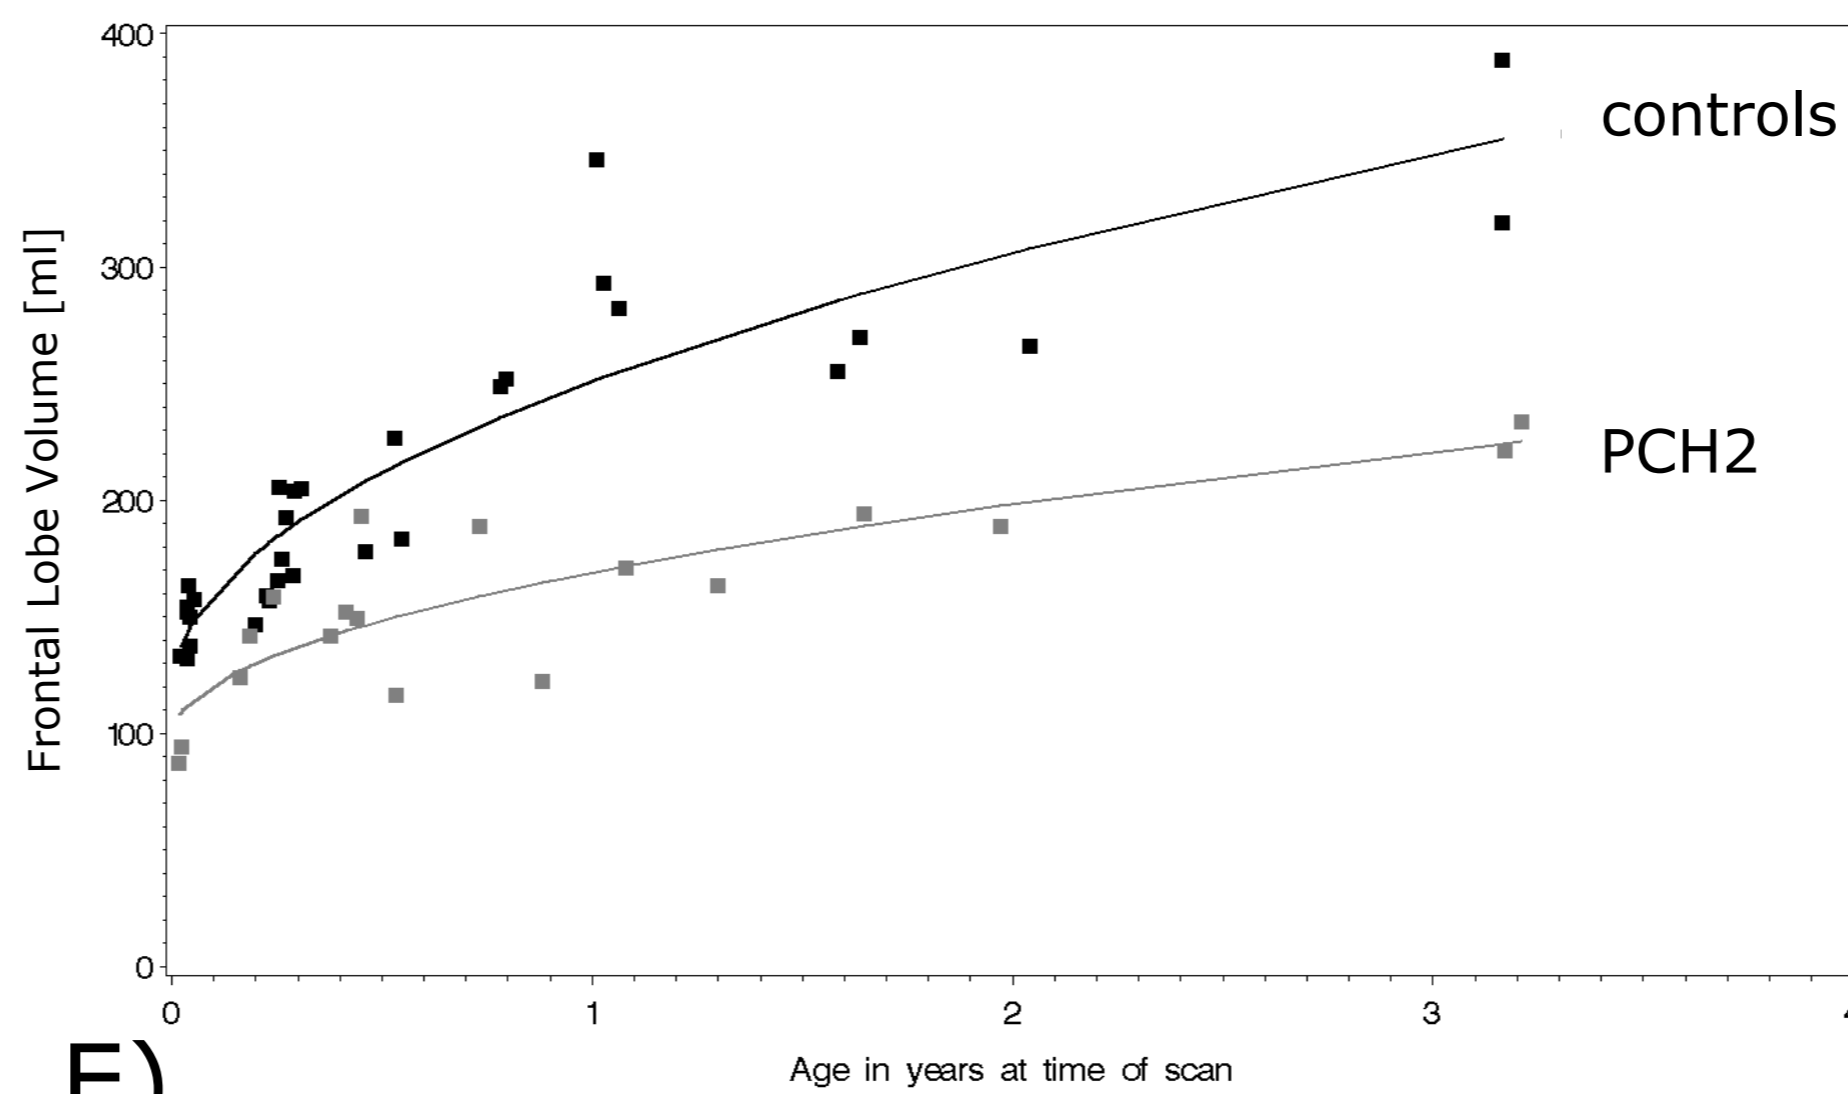

E)

**Online material figure 1:**

Extracts of scatterplots of Figure 2 and 3 of the manuscript over only the first 4 years of life in order to illustrate the early postnatal increase of all brain structures, with the infratentorial structures (A-C) growing to a slower degree compared to supratentorial volumes (D-E). Note, that the frontal lobe is not predominantly affected.
