# Supplementary material for: Brain morphometry in Pontocerebellar Hypoplasia type 2
Source: PubMed Central journal article supplement (PMC4950429; doi:10.1186/s13023-016-0481-4), 2016-07-19
Supplement: 13023_2016_481_MOESM2_ESM.pdf [file 13023_2016_481_MOESM2_ESM.pdf]

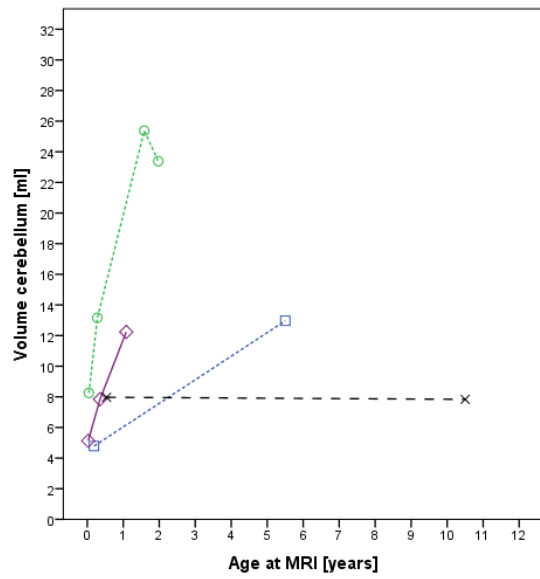

A)

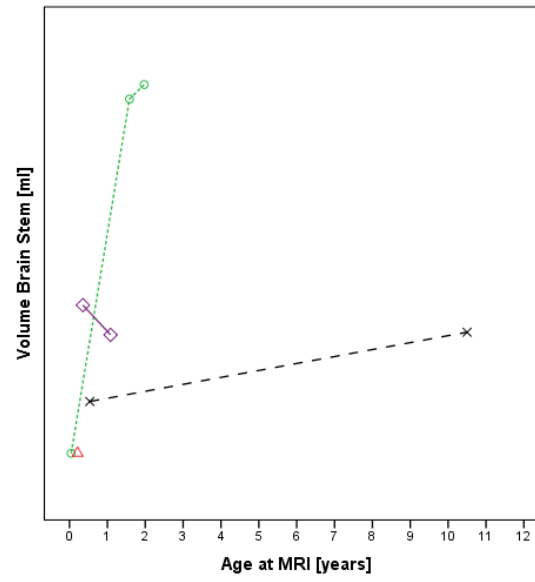

B)

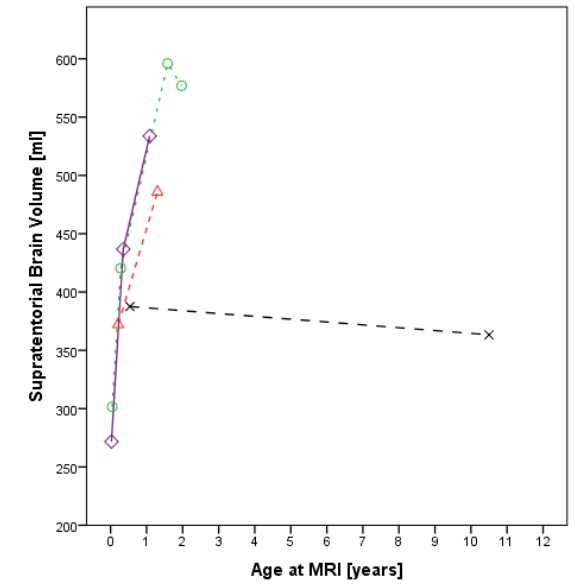

C)

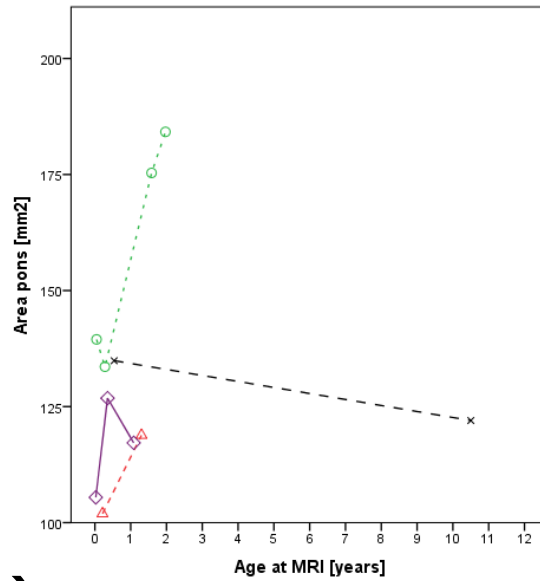

D)

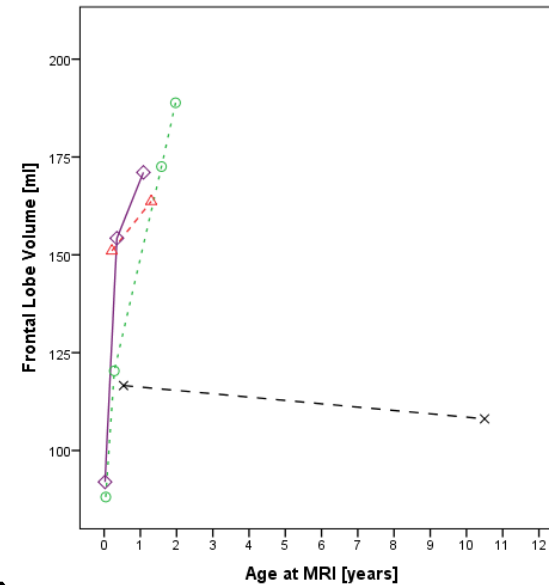

E)

**Online figure 2:**

Longitudinal data demonstrating increase in volumes over the first years of life and partially volume decrease in one long-term follow-up over 10 years.
